# Supplementary material for: Aflatoxin Exposure from Milk in Rural Kenya and the Contribution to the Risk of Liver Cancer
Source: MDPI journal article supplement (doi:10.3390/toxins11080469), 2019-08-10
Supplement: s1 [file s1]

# Supplementary Materials: Aflatoxin Exposure from Milk in Rural Kenya and the Contribution to the Risk of Liver Cancer

Anima J. Sirma, Kohei Makita, Delia Grace Randolph, Daniel Senerwa and Johanna F. Lindahl

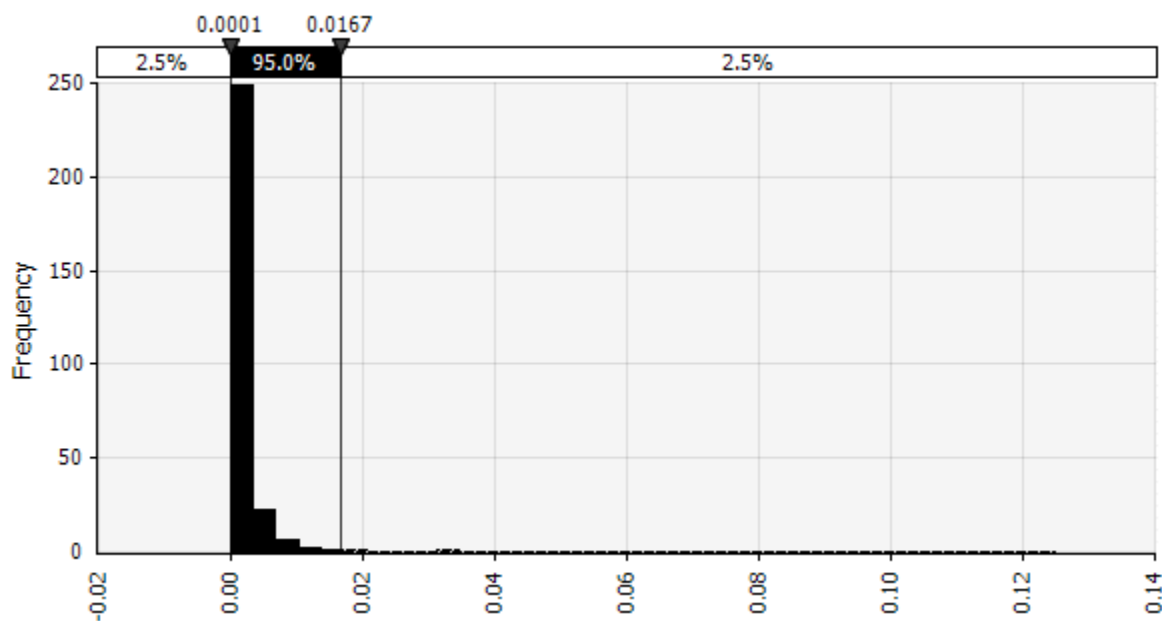

**Figure S1.** Probability distribution of risk of cancer in adult males from a semi-arid agro-ecological zone in Kenya.

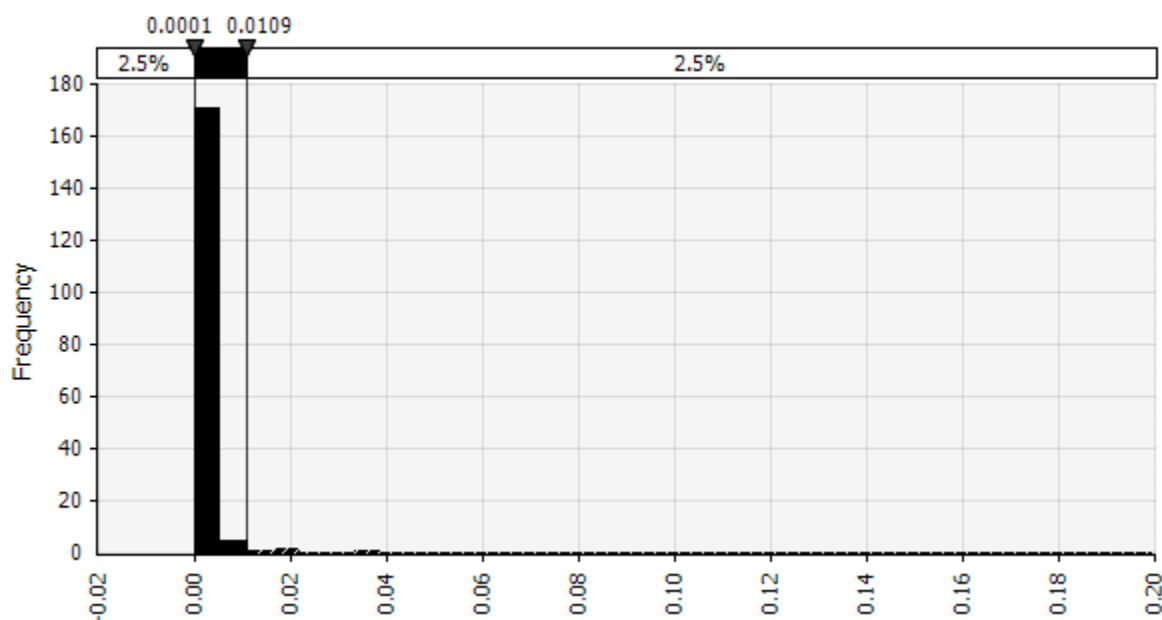

**Figure S2.** Probability distribution of risk of cancer in adult females from a semi-arid agro-ecological zone in Kenya.

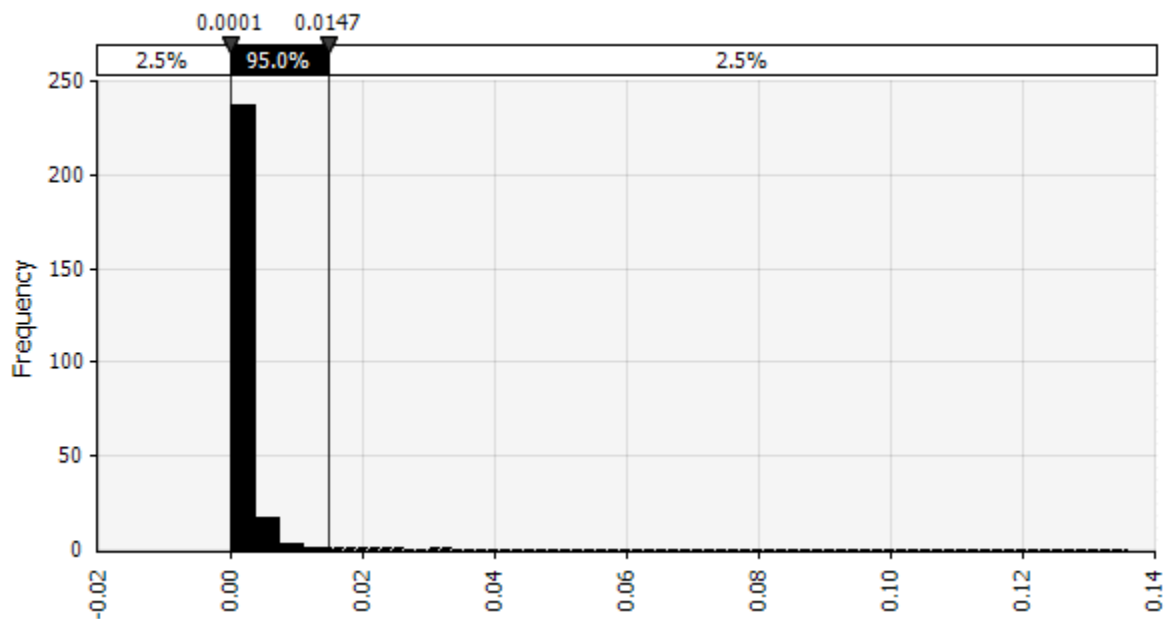

**Figure S3.** Probability distribution of risk of cancer in children 6–18 years old from a semi-arid agro-ecological zone in Kenya.

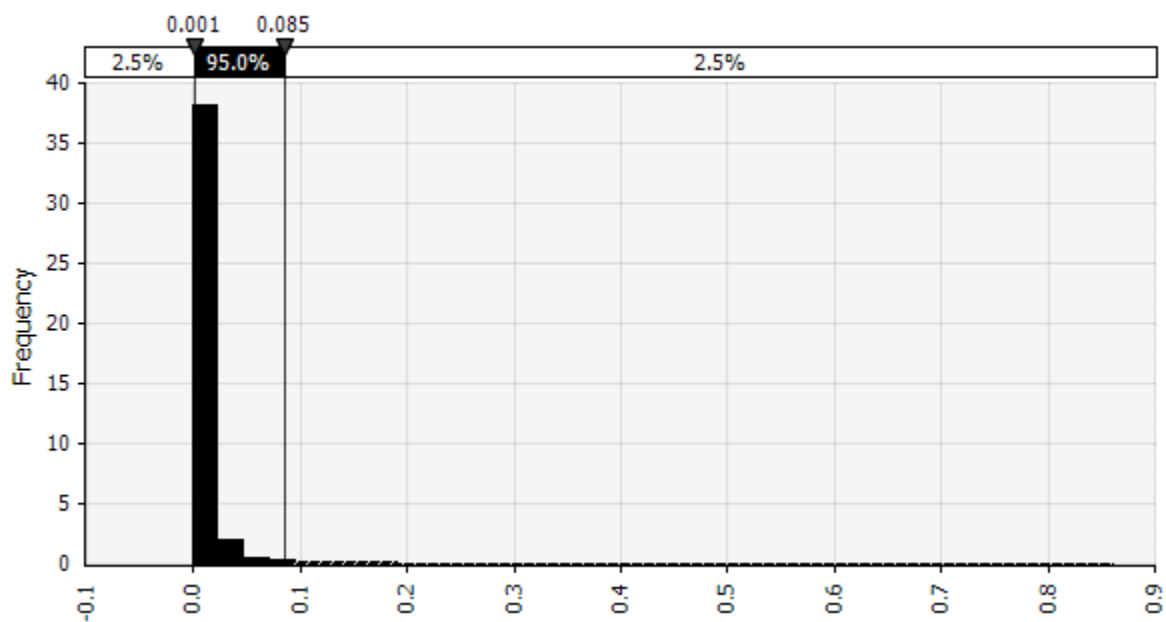

**Figure S4.** Probability distribution of risk of cancer in children less than five years old from a semi-arid agro-ecological zone in Kenya.

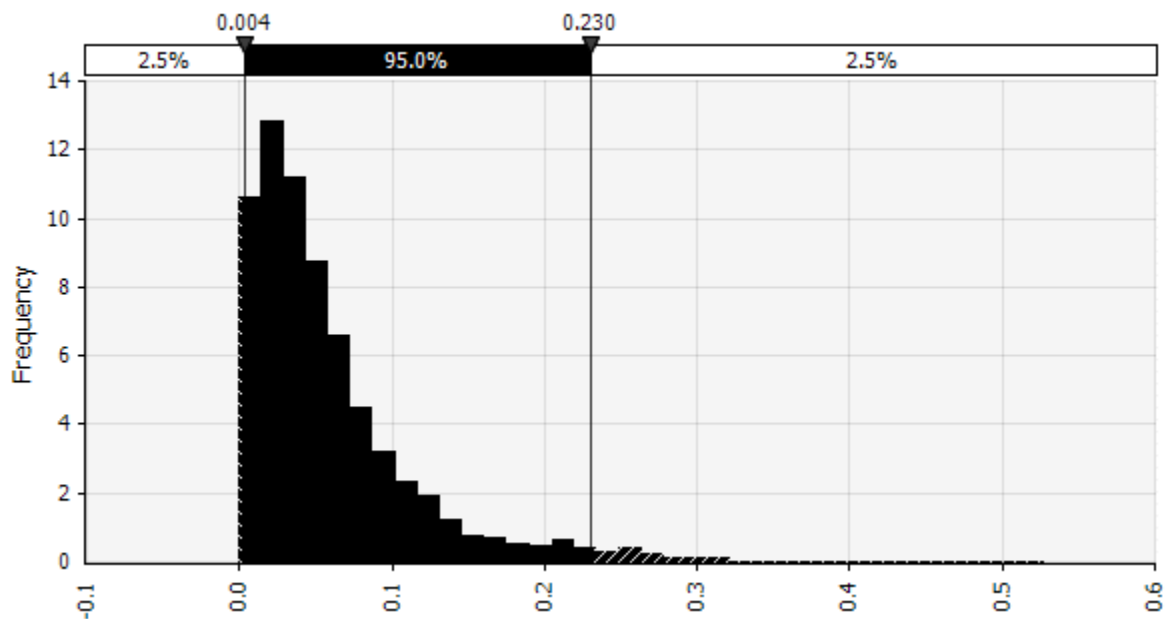

**Figure S5.** Probability distribution of risk of cancer in adult males from a sub-humid agro-ecological zone in Kenya.

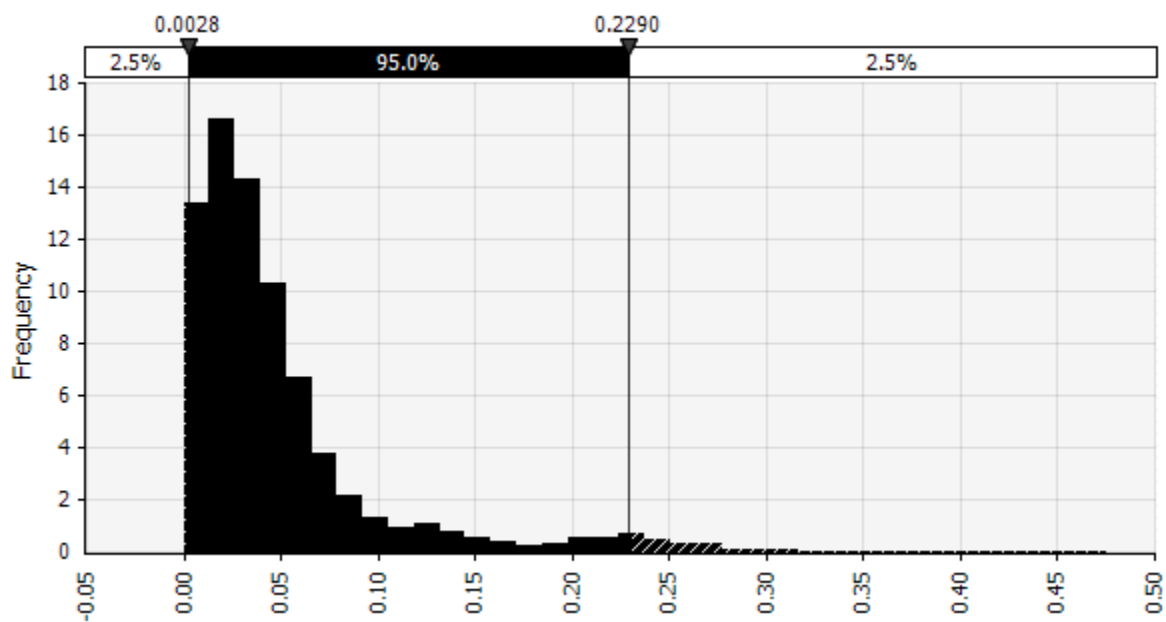

**Figure S6.** Probability distribution of risk of cancer in adult females from a sub-humid agro-ecological zone in Kenya.

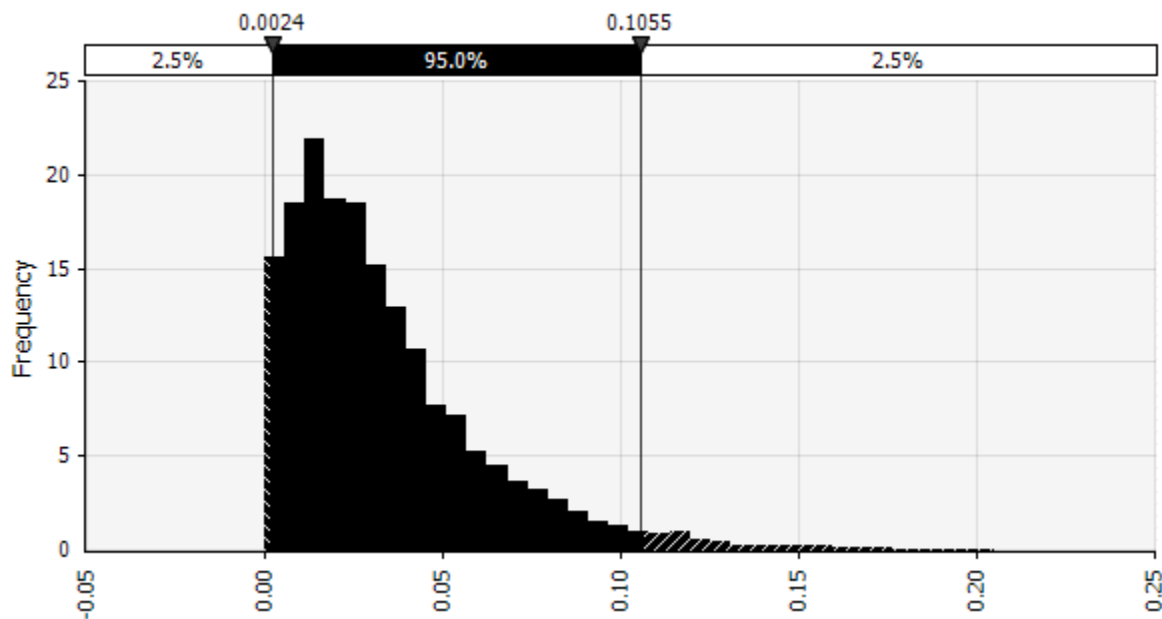

**Figure S7.** Probability distribution of risk of cancer in children 6–18 years old from a sub-humid agro-ecological zone in Kenya.

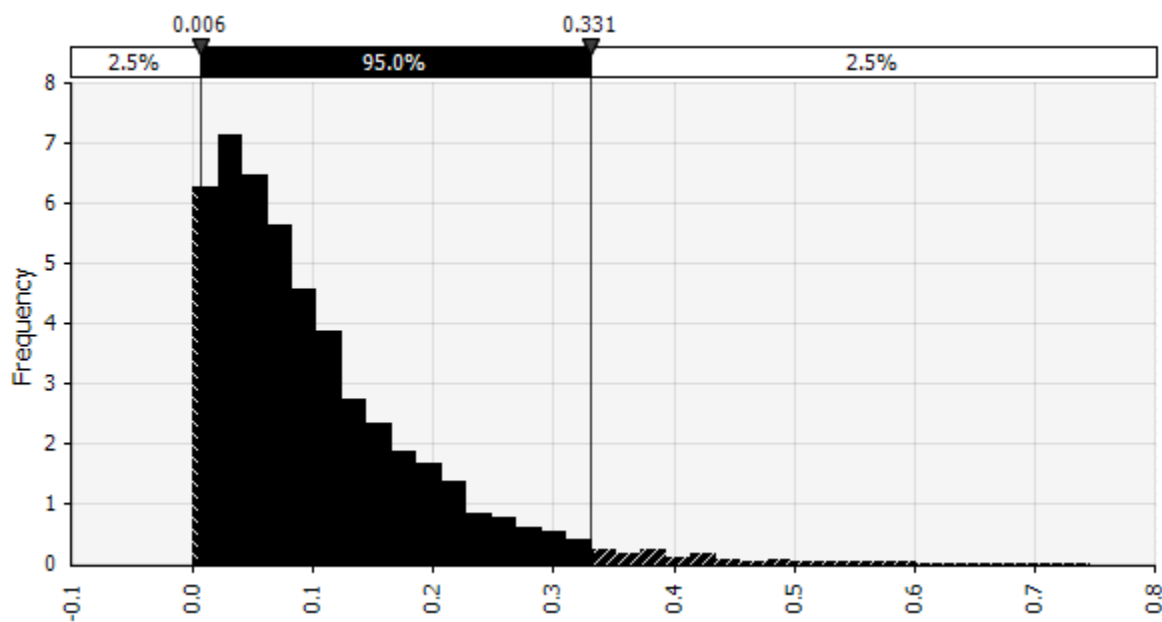

**Figure S8.** Probability distribution of risk of cancer in children less than five years old from a sub-humid agro-ecological zone in Kenya.

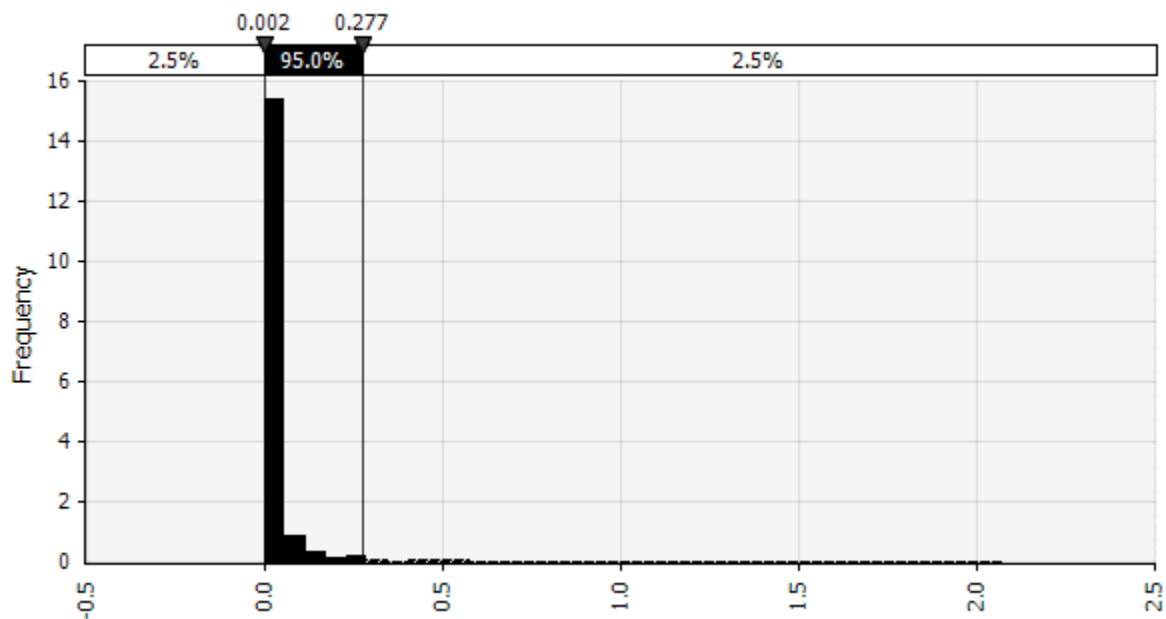

**Figure S9.** Probability distribution of risk of cancer in adult males from a humid agro-ecological zone in Kenya.

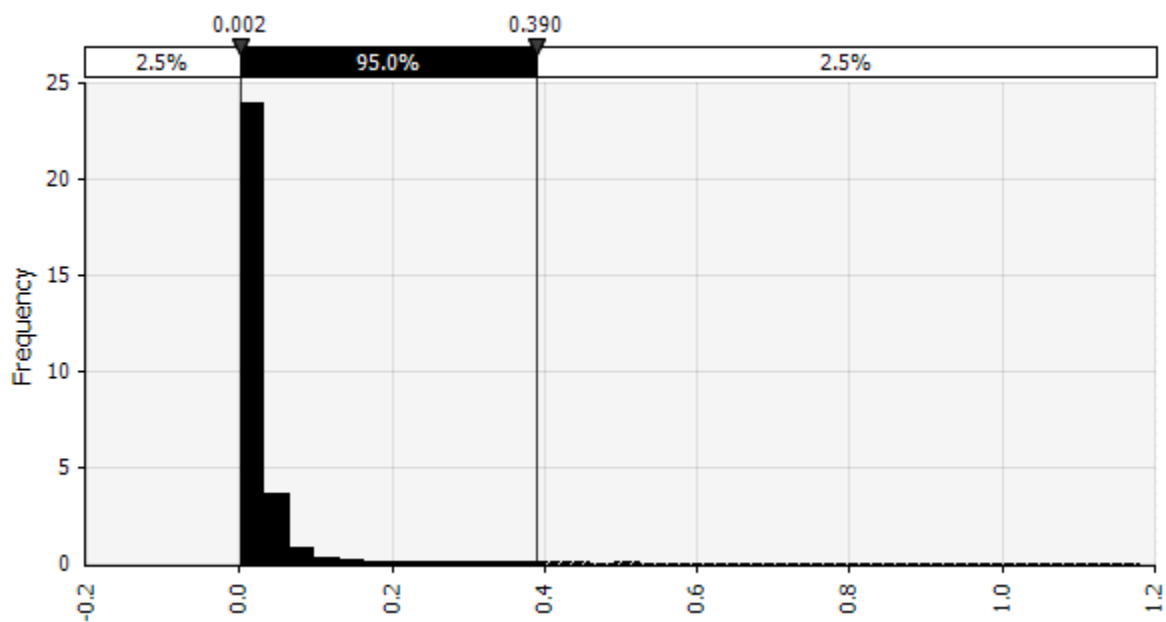

**Figure S10.** Probability distribution of risk of cancer in adult females from a humid agro-ecological zone in Kenya.

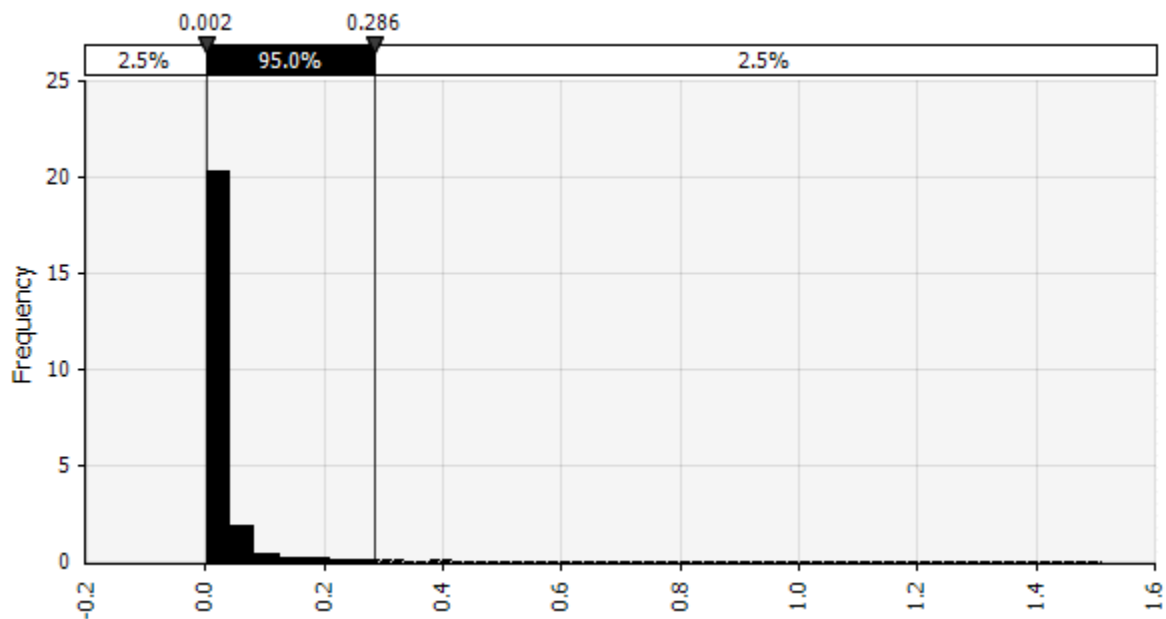

**Figure S11.** Probability distribution of risk of cancer in children 6–18 years old from a humid agro–ecological zone in Kenya.

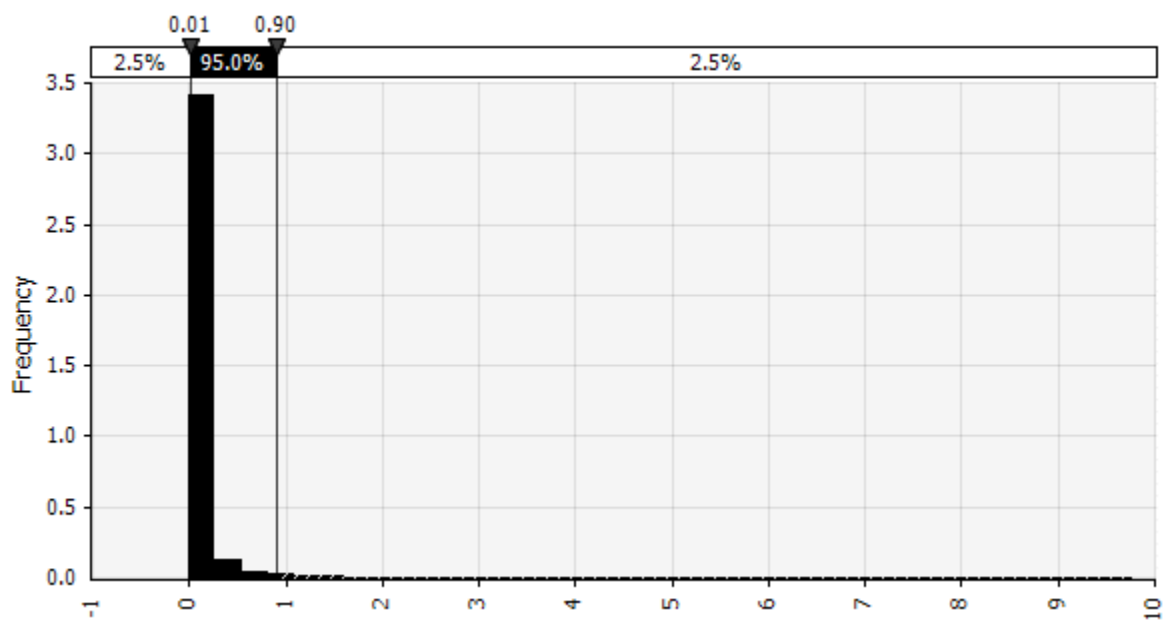

**Figure S12.** Probability distribution of risk of cancer in children less than five years old from a humid agro–ecological zone in Kenya.

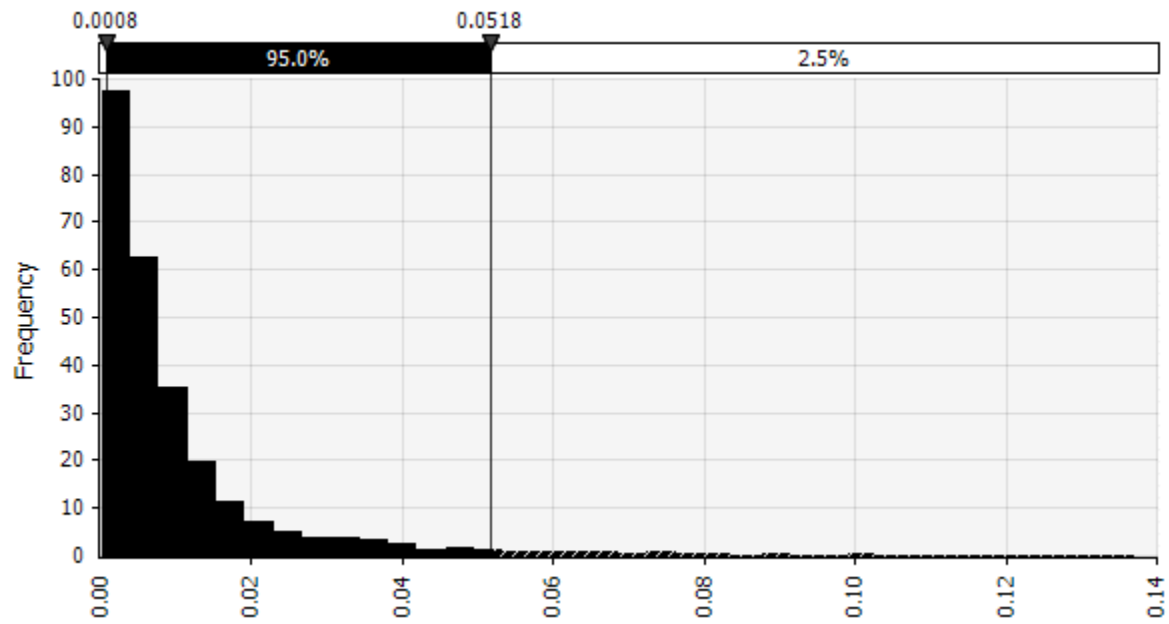

**Figure S13.** Probability distribution of risk of cancer in adult males from a temperate agro-ecological zone in Kenya.

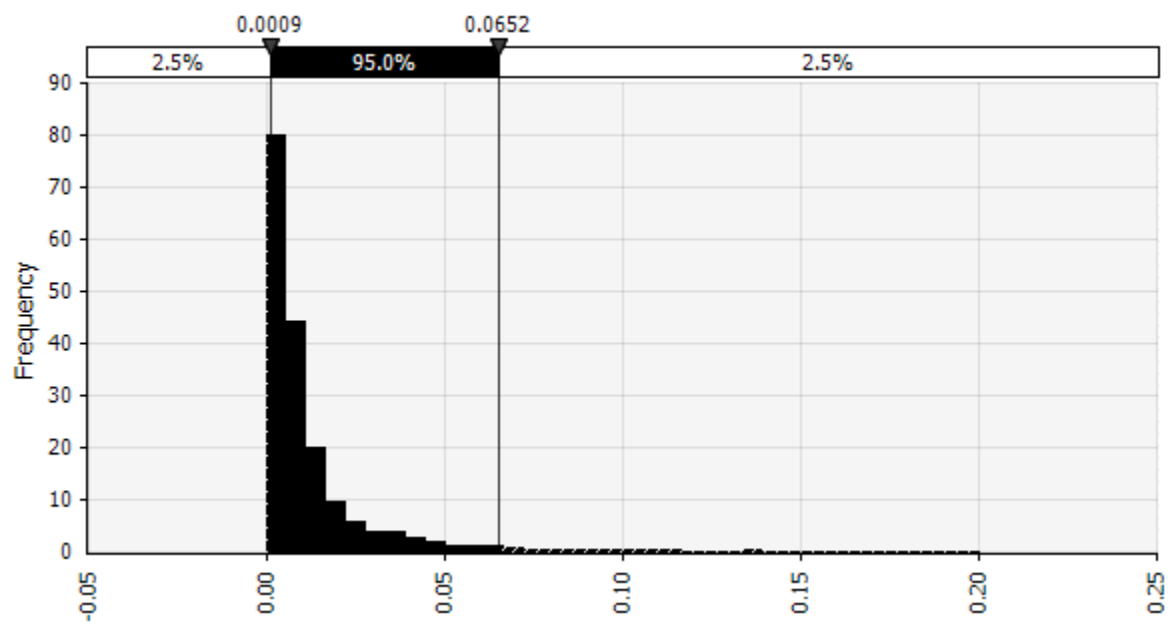

**Figure S14.** Probability distribution of risk of cancer in adult females from a temperate agro-ecological zone in Kenya.

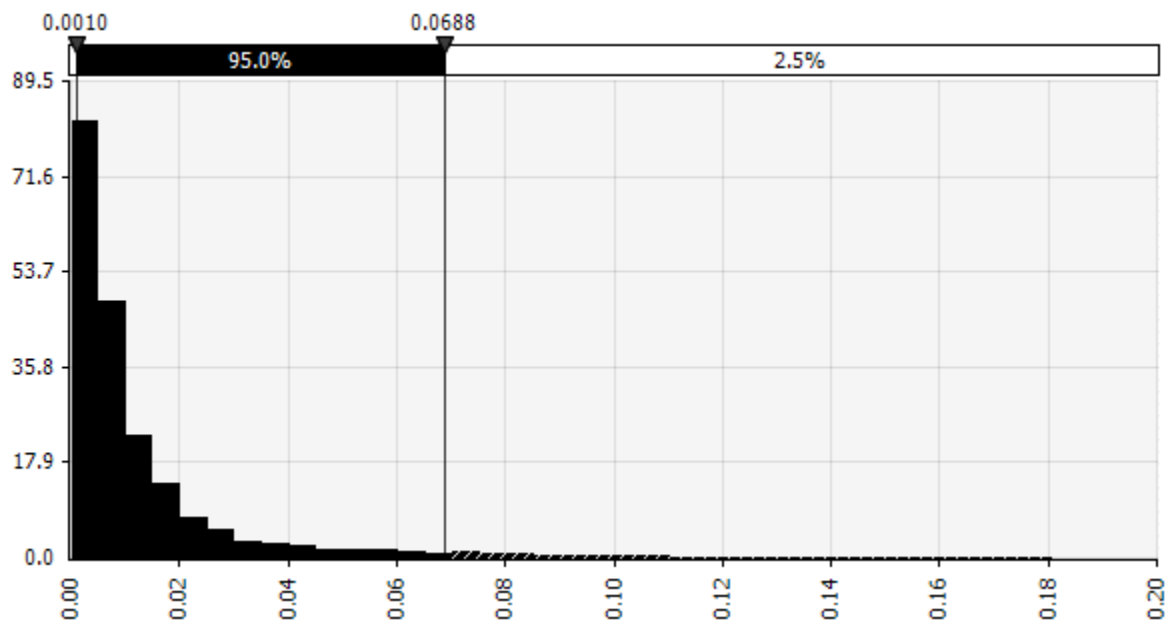

**Figure S15.** Probability distribution of risk of cancer in children 6–18 years old from a temperate agro-ecological zone in Kenya.

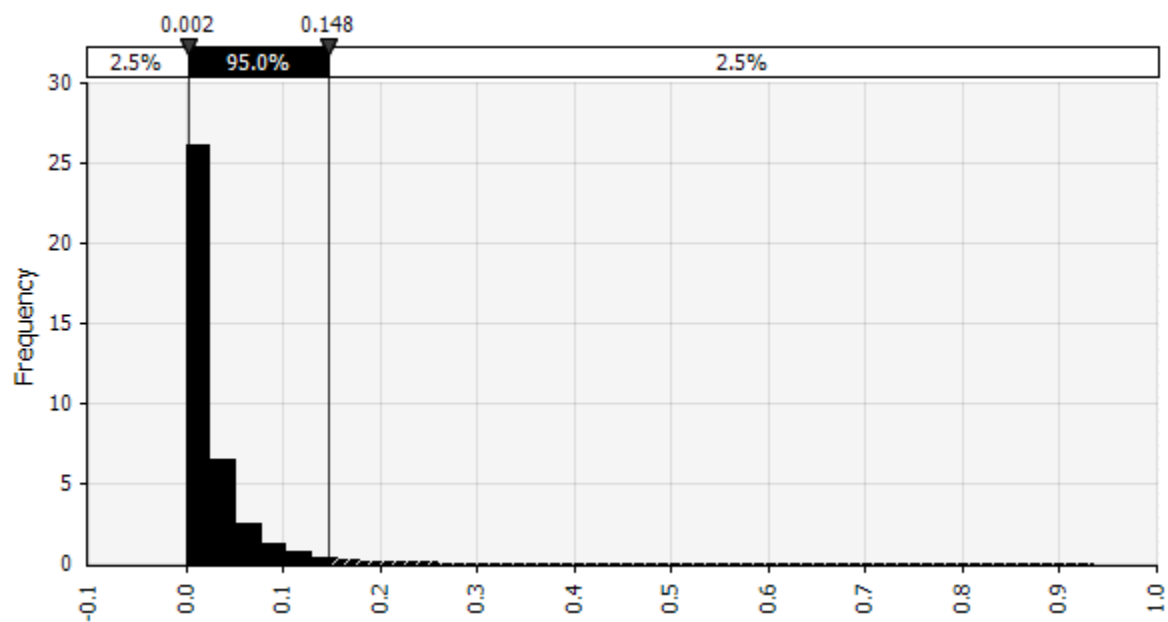

**Figure S16.** Probability distribution of risk of cancer in less than five years old from a temperate agro-ecological zone in Kenya.
